# Supplementary material for: The Myotis chiloensis Guano Virome: Viral Nucleic Acid Enrichments for High-Resolution Virome Elucidation and Full Alphacoronavirus Genome Assembly
Source: MDPI journal article supplement (doi:10.3390/v14020202), 2022-01-20
Supplement: s1 [file s1]

**Table S1: Genomes used for phylogenetic analyses in this study**

| <b>Accession</b> | <b>Description</b>                                                                | <b>Size</b> |
|------------------|-----------------------------------------------------------------------------------|-------------|
| NC_002645        | Human coronavirus 229E, complete genome                                           | 27317       |
| NC_005831.2      | Human Coronavirus NL63, complete genome                                           | 27553       |
| MK211369         | Coronavirus BtSk-AlphaCoV/GX2018A, complete genome                                | 28303       |
| MK211370         | Coronavirus BtSk-AlphaCoV/GX2018B, complete genome                                | 28175       |
| MK211371         | Coronavirus BtSk-AlphaCoV/GX2018C, complete genome                                | 28146       |
| MK211372         | Coronavirus BtSk-AlphaCoV/GX2018D, complete genome                                | 28238       |
| MK211373         | Coronavirus BtRs-AlphaCoV/YN2018, complete genome                                 | 29109       |
| NC_010437        | Bat coronavirus 1A, complete genome                                               | 28326       |
| NC_010438        | Bat coronavirus HKU8, complete genome                                             | 28773       |
| NC_009988        | Bat coronavirus HKU2, complete genome                                             | 27165       |
| KJ473806         | BtMr-AlphaCoV/SAX2011, complete genome                                            | 27935       |
| HQ728480         | Cardioderma bat coronavirus/Kenya/KY43/2006                                       | 15474       |
| NC_018871        | Rousettus bat coronavirus HKU10, complete genome                                  | 28494       |
| JQ989273         | Hipposideros bat coronavirus HKU10 isolate TLC1347A, complete genome              | 28483       |
| MF094687         | Swine acute diarrhea syndrome related coronavirus isolate 141388, complete genome | 27174       |

|                 |                                                                                |              |
|-----------------|--------------------------------------------------------------------------------|--------------|
| <b>HQ728484</b> | <b>Miniopterus bat coronavirus/Kenya/KY27/2006</b>                             | <b>15314</b> |
| <b>MH938450</b> | <b>Alphacoronavirus Bat-CoV/P.kuhlii/Italy/206679-3/2010, complete genome</b>  | <b>28146</b> |
| <b>MH938449</b> | <b>Alphacoronavirus Bat-CoV/P.kuhlii/Italy/3398-19/2015, complete genome</b>   | <b>28128</b> |
| <b>MH938448</b> | <b>Alphacoronavirus Bat-CoV/P.kuhlii/Italy/206645-41/2011, complete genome</b> | <b>27862</b> |
| <b>KJ473795</b> | <b>BtMf-AlphaCoV/AH2011, complete genome</b>                                   | <b>28310</b> |
| <b>KJ473796</b> | <b>BtMf-AlphaCoV/JX2012, complete genome</b>                                   | <b>28311</b> |
| <b>KJ473797</b> | <b>BtMf-AlphaCoV/GD2012, complete genome</b>                                   | <b>28758</b> |
| <b>KJ473798</b> | <b>BtMf-AlphaCoV/HuB2013, complete genome</b>                                  | <b>28755</b> |
| <b>KJ473799</b> | <b>BtMf-AlphaCoV/FJ2012, complete genome</b>                                   | <b>28765</b> |
| <b>KJ473800</b> | <b>BtMf-AlphaCoV/HeN2013, complete genome</b>                                  | <b>28735</b> |
| <b>KJ473807</b> | <b>BtRf-AlphaCoV/HuB2013, complete genome</b>                                  | <b>27608</b> |
| <b>KJ473808</b> | <b>BtRf-AlphaCoV/YN2012, complete genome</b>                                   | <b>26975</b> |
| <b>KJ473809</b> | <b>BtNv-AlphaCoV/SC2013, complete genome</b>                                   | <b>27783</b> |
| <b>KJ473810</b> | <b>BtMs-AlphaCoV/GS2013, complete genome</b>                                   | <b>27576</b> |
| <b>HQ728486</b> | <b>Chaerephon bat coronavirus/Kenya/KY22/2006 polyprotein (ORF1ab)</b>         | <b>15480</b> |
| <b>KT253270</b> | <b>229E-related bat coronavirus isolate BtCoV/FO1A-F2</b>                      | <b>28020</b> |
| <b>HQ728481</b> | <b>Chaerephon bat coronavirus/Kenya/KY41/2006</b>                              | <b>15578</b> |

|           |                                                                  |              |
|-----------|------------------------------------------------------------------|--------------|
| NC_009020 | <b>Pipistrellus bat coronavirus HKU5</b>                         | <b>30482</b> |
| NC_009021 | <b>Rousettus bat coronavirus HKU9</b>                            | <b>29114</b> |
| NC_006577 | <b>Human coronavirus HKU1</b>                                    | <b>29926</b> |
| NC_001846 | <b>Murine hepatitis virus</b>                                    | <b>31357</b> |
| AY304488  | <b>Civet SARS CoV SZ16/2003</b>                                  | <b>29731</b> |
| NC_009694 | <b>Bat coronavirus HKU3</b>                                      | <b>29728</b> |
| DQ249224  | <b>Bat coronavirus HKU6</b>                                      | <b>2780</b>  |
| DQ249228  | <b>Miniopterus bat coronavirus HKU8</b>                          | <b>2780</b>  |
| AF124991  | <b>Turkey coronavirus RNA-directed RNA polymerase (pol) gene</b> | <b>919</b>   |
| DQ648822  | <b>Bat coronavirus A515/2005</b>                                 | <b>431</b>   |
| DQ648828  | <b>Bat coronavirus (BtCoV/A620/2005)</b>                         | <b>423</b>   |
| FJ710046  | <b>Bat coronavirus Hipposideros/GhanaKwam/19/2008</b>            | <b>817</b>   |
| FJ710047  | <b>Bat coronavirus Hipposideros/GhanaKwam/20/2008</b>            | <b>817</b>   |
| EU375854  | <b>Bat coronavirus M.das/Germany/D3.3/2007</b>                   | <b>405</b>   |
| EF544563  | <b>Rocky Mountain Bat Coronavirus 11</b>                         | <b>441</b>   |

|           |                                                                  |              |
|-----------|------------------------------------------------------------------|--------------|
| NC_009020 | <b>Pipistrellus bat coronavirus HKU5</b>                         | <b>30482</b> |
| NC_009021 | <b>Rousettus bat coronavirus HKU9</b>                            | <b>29114</b> |
| NC_006577 | <b>Human coronavirus HKU1</b>                                    | <b>29926</b> |
| NC_001846 | <b>Murine hepatitis virus</b>                                    | <b>31357</b> |
| AY304488  | <b>Civet SARS CoV SZ16/2003</b>                                  | <b>29731</b> |
| NC_009694 | <b>Bat coronavirus HKU3</b>                                      | <b>29728</b> |
| DQ249224  | <b>Bat coronavirus HKU6</b>                                      | <b>2780</b>  |
| DQ249228  | <b>Miniopterus bat coronavirus HKU8</b>                          | <b>2780</b>  |
| AF124991  | <b>Turkey coronavirus RNA-directed RNA polymerase (pol) gene</b> | <b>919</b>   |
